# Supplementary material for: Efficient generation of Rosa26 knock-in mice using CRISPR/Cas9 in C57BL/6 zygotes
Source: PubMed Central journal article supplement (PMC4715285; doi:10.1186/s12896-016-0234-4), 2016-01-16
Supplement: 12896_2016_234_MOESM2_ESM.pdf [file 12896_2016_234_MOESM2_ESM.pdf]

# Efficient generation of *Rosa26* knock-in mice using CRISPR/Cas9 in C57BL/6 zygotes

Van Trung Chu, Timm Weber, Robin Graf, Thomas Sommermann, Kerstin Petsch, Ulrike Sack, Pavel Volchkov, Klaus Rajewsky, Ralf Kühn

## Additional file 2

### Supplementary Methods

1. Production of sgRNA
2. Production of Cas9-162A mRNA
3. Preparation of targeting vector DNA
4. Preparation of microinjection buffer
5. Preparation of aliquots for pronuclear microinjection
6. Genotyping of blastocysts derived from microinjected zygotes

### Plasmid maps

pCAG-Cas9-162A

pU6-sgRosa26-1\_CBh-Cas9-T2A-BF

### Supplementary Methods

#### 1. Production of sgRNA

##### 1.1. Generating a T7-PCR template for in vitro transcription ●TIMING 1 d

For sgRNA preparation amplify the sgRNA region from the sgRNA plasmid pU6-sgRosa26-1\_CBh-Cas9-T2A-BFP (Addgene #64214) using primers T7-sgRosa26-1-for and sgRNA-rev:

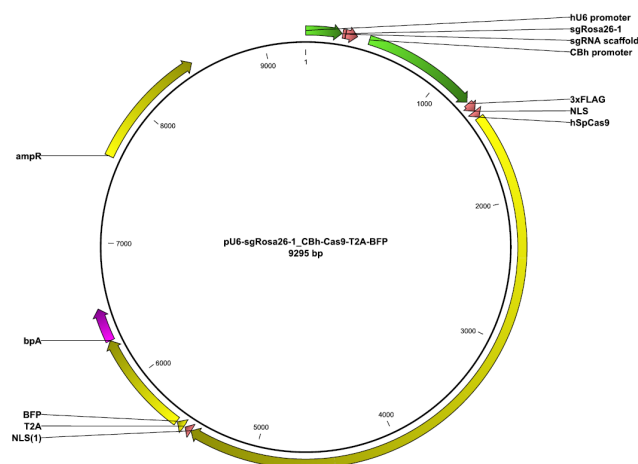

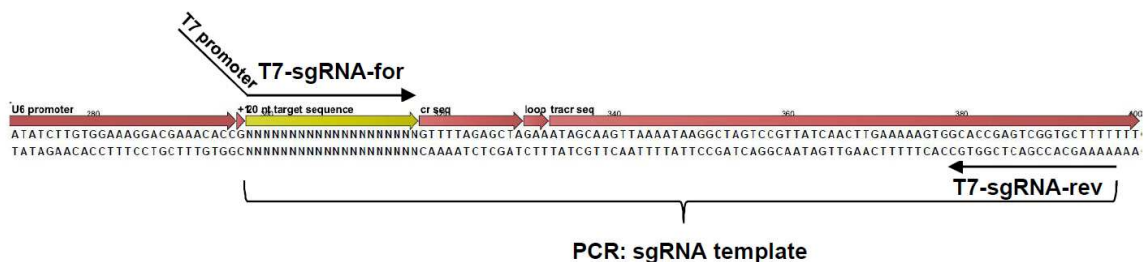

| Primer          | Sequence (5'–3')                           |
|-----------------|--------------------------------------------|
| T7-sgRosa26-for | TTAATACGACTCACTATAGGACTCCAGTCTTTCTAGAAGAGT |
| T7-sgRNA-rev    | AAAAGCACCGACTCGGTGCC                       |

Using these primers, set up 3-5 x 50ul PCR reactions:

| Reagents                                                              | 50µl PCR reaction | For 5 x 50µl PCR reactions |
|-----------------------------------------------------------------------|-------------------|----------------------------|
| pU6-sgRosa26-1_CBh-Cas9-T2A-BFP                                       | 2 µl              | 10 µl                      |
| 10x (5x) buffer                                                       | 5 (10) µl         | 25 (50) µl                 |
| dNTPs (10 mM)                                                         | 1 µl              | 5 µl                       |
| Primer T7-sgRosa26-for (50 pMol/µl)                                   | 1 µl              | 5 µl                       |
| Primer T7-sgRNA-rev (50 pMol/µl)                                      | 1 µl              | 5 µl                       |
| Herculase II                                                          | 1 ul              | 5 ul                       |
| H <sub>2</sub> O                                                      | 39 (34)µl         | 195 (170) µl               |
| PCR program:                                                          |                   |                            |
| 95°C 3min; 35 cycles of [95°C-20s; 54-58°C-20s; 72°C-20s]; 72°C-3 min |                   |                            |

- Run 5 ul of the PCR product on a 2% agarose gel to estimate its concentration and to verify that the product is unique and has the expected size of 100 bp. PCR should be optimized to yield a single specific band to avoid gel purification.

- Pool the 3-5 PCR reactions for purification using the Qiagen PCR purification kit. Elute with 30 µl RNase free water. Quantify using a Biophotometer or Nanodrop; a concentration of ≥ 125 ng/ul is required for IVT (see below).

**PAUSE POINT** samples can be stored at -20°C for 6 months

## 1.2 In vitro Transcription (IVT) ●TIMING 1 d

The sgRNA PCR product is used as template for in-vitro transcription using the Ambion MEGA shortscript T7 Kit (AM1354) following the manual, for a 20 µl IVT reaction add:

- 1 µg of the sgRNA PCR template, in a volume up to 8 µl
- 2 µL 10X Reaction Buffer
- 2 µL ATP Solution (75 mM)
- 2 µL CTP Solution (75 mM)
- 2 µL GTP Solution (75 mM)
- 2 µL UTP Solution (75 mM)
- X µl water (Nuclease-free), to 18 µL final volume
- 2 µL T7 Enzyme Mix
- Mix, incubate 2-4 h at 37°C

### 1.3 sgRNA purification

Use the Ambion MEGAclean kit (AM1908) to purify the *in vitro* transcribed RNA following the manual:

To the 20 µl transcription reaction add:

- 80 µl **elution solution**
- 350 µl **binding buffer** (20 ml EtOH added to new bottle)
- 250 µl **Ethanol** (100%)
- Mix and apply to column in the collection tube
- Spin column for 1 min at 12.000 rpm
- Wash column 2x with 500 µl wash solution, spin 1 min, discard flowthrough
- Spin the empty column for 30 sec at 12.000 rpm
- Place column into a new collection tube
- Apply 50 µl elution solution, close the lid, place into an incubator at 65-70°C for 5-10 min (Alternatively, apply 50 µl of elution solution preheated to 95°C)
- Spin for 1 min at 12.000 rpm
- Apply another 50 µl of elution solution, close the lid, place into an incubator at 65-70°C for 5-10 min (Alternatively, apply another 50 µl of elution solution preheated to 95°C)
- Spin for 1 min at 12.000 rpm, save the eluate, discard the column

To the eluate (100 µl) add:

- 10 µl 5 M Ammoniumacetate (1/10 Vol)
- 275 µl Ethanol (2.5 Vol)

Incubate at -20°C for ≥ 30 min or **overnight**

**PAUSE POINT** samples can be left overnight at -20°C for precipitation

- Spin for 15 min at 15.000 g
- Wash the pellet with 500 µl of 70% Ethanol, spin 1 min, discard supernatant
- Spin the dry tube for 10 sec and take off last traces of Ethanol
- Air dry the open tube for 3-5 min

Resuspend the pellet in 30 µl T<sub>10</sub>E<sub>0.1</sub> injection buffer, incubate 5-10 min at 37°C, mix

- use 1 µl to measure concentration by OD<sub>260</sub> (expected yield: 0.5 - 1 µg/µl)
- run 1 µg RNA on a 2% agarose gel (RNase-free) (sgRNA size: 100 nt)

**▲ CRITICAL STEP** Run 500 ng of denatured sgRNA (70°C for 10 min) on a 2% agarose gel to confirm integrity before injection. Smear bands indicate degradation and these samples should be discarded. Take care to use an **RNAse free** gel chamber and buffers !

**PAUSE POINT** Store the samples at -80 °C for the preparation of injection aliquots (up to 2 months).

## 2. Production of Cas9-162A mRNA

### 2.1 Isolation of the T7-Cas9 template for in vitro transcription ●TIMING 1 d

For IVT of Cas9 mRNA a 4.5 kb XbaI-AsiSI fragment including the T7 promoter, Cas9 coding region and a poly A tail (162A; plasmid coded), is isolated from the plasmid pCAG-Cas9-162A. Ascl is used in addition to cut the plasmid's backbone into smaller fragments. Map of pCAG-Cas9-162A:

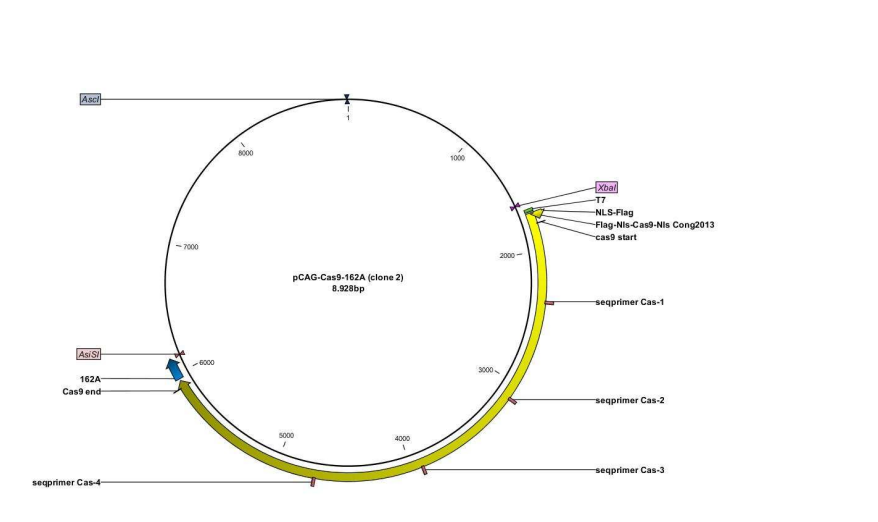

1. Set up a restriction enzyme digestion as follows:

| Reagent                     | In 100 µl         |
|-----------------------------|-------------------|
| pCAG-Cas9-162pA plasmid DNA | 10 µg             |
| 10x buffer NEB CutSmart     | 10 µl             |
| XbaI (20 U/ul, NEB 0145)    | 2 µl              |
| AsiSI (10 U/ul, NEB R0630)  | 4 µl              |
| Ascl (10 U/ul, NEB R0558)   | 4 µl              |
| H <sub>2</sub> O            | fill up to 100 µl |

2. Incubate at 37°C for 2h

3. Add 20 µl of 6x gel loading buffer to the digestion reaction and load 10 µl into the first lane of a 0.9 % agarose gel (12 x 12 cm), next to a size marker in the second lane. Keep three or more lanes free and load the remaining volume (110 µl) into the next 3-4 lanes. Run the gel at 120V for 1.5h and cut off the left 2 lanes and take an image of this gel segment under short wave UV light. There should be three fragments of 1.6, 2.8 and 4.5 kb visible.

4a. **Option A:** If the digestion looks ok, cut out the largest, 4.5 kb (XbaI-AsiSI) band (representing the T7-Cas9-162A IVT template) under **long wave UV light** (365 nm) and isolate the DNA using the Qiagen gel extraction kit with a final elution volume of 30 µl. (Alternatively, for higher concentrations, use the Qiagen Minelute gel extraction kit (Qiagen #28604) and 10 µl elution buffer)

4b. **Option B:** If the digestion looks ok, precipitate the DNA by adding 10 µl 3 M NaAc + 250 µl EtOH > 30 min/-20°C. Spin 10 min, wash w. 70% EtOH, air dry & solve in 25 µl water (nuclease-free)

5. Determine the DNA concentration using a Biophotometer or Nanodrop, each IVT reaction needs 1 µg of the fragment in a volume of ≤ 6 µl, therefore a DNA concentration of ≥ 166 ng/µl is necessary.

## 2.2 Cas9 in vitro Transcription (IVT) ●TIMING 1 d

The Cas9-162pA template is in-vitro transcribed using the Ambion mMESSAGE mMACHINE®T7 Ultra Kit (AM 1345) following the manual, for a 20 µl IVT reaction add:

- 1 µg of the template DNA fragment, in a volume up to 6 µl
  - 10 µl T7 2x NTP/ARCA
  - 2 µl 10x buffer (at room temperature)
  - **x** µl water (Nuclease-free), to a final volume of 18 µl
  - 2 µl enzyme mix
- Mix, incubate for 2h at 37°C

### 2.3a Cas9 mRNA purification: Option 1 - MegaClearkit

Use the Ambion MEGAClear kit (AM1908) to purify the *in vitro* transcribed mRNA following the manual:

To the 20 µl transcription reaction add:

- - 80 µl **elution solution**
- - 350 µl **binding buffer** (20 ml EtOH added to new bottle)
- - 250 µl **Ethanol** (100%)
- Mix and apply to column in the collection tube
- Spin column for 1 min at 10-15.000 g
- Wash column 2x with 500 µl wash solution, spin 1 min, discard flowthrough
- Spin the empty column for 30 sec at 10-15.000 g
- Place column into a new collection tube
- Apply 50 µl elution solution, close the lid, place into an incubator at 65-70°C for 5-10 min (Alternatively, apply 50 µl of elution solution, preheated to 95°C)
- Spin for 1 min at 10-15.000 g

- Apply another 50 µl of elution solution, close the lid, place into an incubator at 65-70°C for 5-10 min (Alternatively, apply another 50 µl of elution solution, preheated to 95°C)
- Spin for 1 min at 10-15.000 g, save the eluate, discard the column

### Or: 2.3b Cas9 mRNA purification: Option 2 - Oligotex kit

Use the Qiagen mRNA mini kit (#70022) to purify the *in vitro* transcribed mRNA following the manual:

To the 20 µl transcription reaction add:

- 180 µl Water (nuclease-free)
- 200 µl buffer OBB (if precipitate present, warm at 37°C)
- 20 µl Oligotex suspension (before warmed to 37°C and vortexed)

- Mix and incubate at 70°C for 3 min
- place at room temperature for 10 min
- apply to column in the collection tube
- Spin the column for 1 min at 12.000 rpm
- Transfer column into a new collection tube
- Wash column with 400 µl buffer OW2, spin 1 min, discard flowthrough
- Wash column again with 400 µl buffer OW2, spin 1 min
- Transfer column into a new collection tube
- apply 25 µl of elution buffer OEB (preheated to 70°C), pipette 3-4x to resuspend resin
- Spin for 1 min at 12.000 rpm
- Apply another 25 µl of buffer OEB (preheated to 70°C), pipette 3-4x to resuspend resin
- Spin for 1 min at 12.000 rpm, save the eluate, discard the column

## 2.4 Precipitation

To the eluate (100 µl) add:

- 5 µl 5 M Ammoniumacetate (1/10 Vol)
- 138 µl Ethanol (2.5 Vol)

Incubate at -20°C for ≥ 30 min or **overnight**

**PAUSE POINT** *samples can be left overnight at -20°C for precipitation*

- Spin for 15 min at 15.000 g
- Wash the pellet with 500 µl of 70% Ethanol, spin 1 min, discard supernatant
- Spin the dry tube for 10 sec and take off last traces of Ethanol
- Dry the pellet at air in the tube with open lid for 3-5 min

Resuspend the pellet in 30 µl T<sub>10</sub>E<sub>0.1</sub> injection buffer, incubate 5-10 min at 37°C, mix

**PAUSE POINT** *Store the samples at -80 °C for the preparation of injection aliquots (up to 2 months).*

## 2.5 RNA analysis

- use 1 µl to measure concentration by OD<sub>260</sub> (expected yield: 0.5 - 1 µg/ul)

**Gel option A:** run 1 µg RNA on a standard 0.9 % agarose gel (RNase-free) (mRNA size: 4411 nt). Run 1 µg of heat denatured mRNA (70°C for 10 min) on a 0.9% agarose gel (TAE/TBE) (1 µg/ml Ethidiumbromide) to confirm integrity before injection. Smear bands indicate degradation and these samples should be discarded. Take care to use an **RNase free** gel chamber and buffers !

**Gel option B:** For optimal results use denaturing (glyoxal) gel electrophoresis and Northern Max-Gly reagents from Ambion: Mix 1 ug RNA in 10 µl water (nuclease-free) with 10 ul NorthernMax®-Gly Sample Loading Dye (AM8551), incubate at 50C for 30 min. Load on a 0.9% agarose gel prepared with NorthernMax®-Gly 10x gel prep/running buffer (AM8678) and 1 µg/ml Ethidiumbromide. As size marker load 2 µg of RNA Millenium size marker (AM7150), treated as above with AM8551.

Example gel:

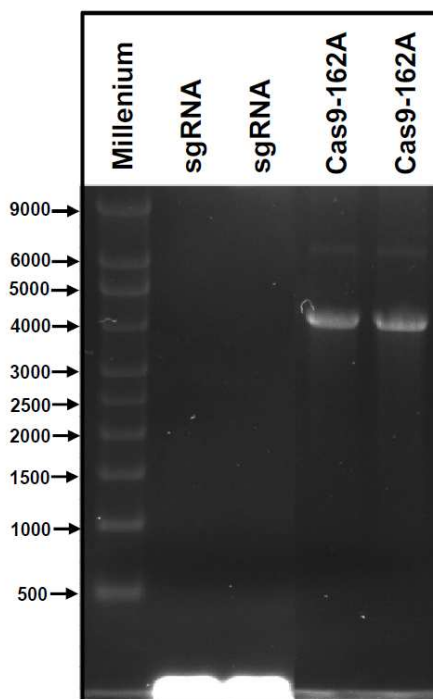

**Gel option C:** Run the RNA in the Agilent Bioanalyser using the Agilent RNA 6000 Nano kit (#5067-1511), following Agilent's instruction manual: [http://www.chem.agilent.com/Library/usermanuals/Public/G2938-90034\\_RNA6000Nano\\_KG.pdf](http://www.chem.agilent.com/Library/usermanuals/Public/G2938-90034_RNA6000Nano_KG.pdf)

### 3. Preparation of targeting vector DNA ●TIMING 2h

1. Precipitate 15 µg of plasmid DNA (Qiagen Maxiprep) of the gene targeting vector by adding 0.1 volumes of 3 M sodium acetate and 2.5 volumes of ethanol. Incubate the mixture for 30 min at RT and pellet the DNA by centrifugation at 16.000g for 10 min at RT.
2. Discard the supernatant and wash the pellet by the addition of 500 ul of 70% (vol/vol) ethanol (prepared with embryo-tested water, available from the TCF). Centrifuge the tube at

16.000g for 2 min at RT, discard the supernatant and repeat the washing step. Discard the supernatant and air-dry the pellet for 5 min.

3. Resuspend the DNA pellet in 30  $\mu$ l of T<sub>10</sub>E<sub>0.1</sub> microinjection buffer for 30 min at 37 °C. Mix by pipetting and use 1  $\mu$ l to determine the DNA concentration using a Biophotometer or Nanodrop. Store the DNA solution at –80 °C for the preparation of microinjection samples.

#### 4. Preparation of microinjection buffer (T<sub>10</sub>E<sub>0.1</sub>)

T<sub>10</sub>E<sub>0.1</sub> microinjection buffer contains 10 mM Tris and 0.1 mM EDTA (pH 7.4), made of reagents of the highest purity to avoid embryo toxicity.

Stock preparation:

- 1 M Tris-base stock solution is prepared by dissolving 3030 mg of Trizma base (Sigma ultra T6791, Mw=121,14) in 25 ml of embryo-tested water (Sigma W1503)
- 1 M Tris-acid stock solution is prepared by dissolving 3940 mg of Trizma hydrochloride (Sigma ultra T6666, Mw=157,6) in 25 ml of embryo-tested water.
- 5 mM EDTA stock solution is prepared by dissolving 93 mg of EDTA disodium salt dihydrate (Sigma E4884, Mw=372,24) in 50 ml embryo tested water.

For preparation of 25 ml T<sub>10</sub>E<sub>0.1</sub> buffer combine in a 50 ml Falcon tube:

- 24.25 ml embryo-tested water
- 40.85  $\mu$ l Tris-base stock (1 M)
- 209  $\mu$ l TRIS-acid stock (1 M)
- 500  $\mu$ l EDTA stock (5 mM)

Give this mixture into a 20-ml disposable syringe and filter through a Millex GV filter (Millipore, cat. no. SLGV033RS), discarding the first 5 ml of the filtrate. Use 100ul buffer to confirm that the pH value falls into the range of 7.0–7.5, by using pH test strips. Store T<sub>10</sub>E<sub>0.1</sub> injection buffer in 1 ml aliquots at –80 °C for up to 2 years.

#### 5. Preparation of aliquots for pronuclear microinjection •TIMING 2 h

Thaw the sgRNA and Cas9 mRNA the DNA and a tube of T<sub>10</sub>E<sub>0.1</sub> microinjection buffer. For each day of microinjection, a single-use aliquot of 30  $\mu$ l of injection solution is used, in total a volume of 150  $\mu$ l injection solution is needed for a complete pronucleus microinjection experiment of up to 5 microinjection days (5 x 10 superovulated female mice for zygote production). Standard concentrations are:

|                       |                                  |
|-----------------------|----------------------------------|
| Cas9 mRNA:            | <b>25 ng/<math>\mu</math>l</b>   |
| sgRNA:                | <b>12.5 ng/<math>\mu</math>l</b> |
| Targeting vector DNA: | <b>20 ng/<math>\mu</math>l</b>   |



To prepare 150 µl of a master mix, combine in a clean, dust-free 1.5-ml tube:

- 3750 ng of Cas9 mRNA
- 1875 ng of sgRNA (each)
- 3000 ng targeting vector
- adjust with T<sub>10</sub>E<sub>0.1</sub> buffer to a final volume of 150 µl

For the removal of dust particles, the master mix is filtered by using a centrifugal filter (Ultrafree, PFTE, Millipore, cat. no. UFC30LG25, available from the TCF):

- load the master mix into the filter cartridge
- centrifuge at 12,000g for 1 min at RT.
- Pipette the filtrate in aliquots of 30 µl into five clean 1.5-ml tubes, labelled with the TCF project number and date of preparation.

Store the microinjection samples at –80 °C and them over to the TCF microinjection service. One tube is used for each day of embryo injection. Microinjection samples can be safely used for embryo injections up to 6 (-8) weeks after RNA production.

**▲ CRITICAL STEP** Avoid any contamination of the microinjection samples with dust particles, which will block injection capillaries, by using 1.5-ml tubes taken from a freshly opened bag. Best use individually packed Eppendorf 1.5 ml `Biopure´ tubes (Cat No.: 0030 121.589).

## 6. Genotyping of blastocysts derived from microinjected zygotes

### 6.1 Blastocyst collection

Add 10 µl Quick DNA extraction solution (QuickExtract™ DNA Extraction Solution, QE09050, Epicentre) into each well of a 96 well PCR plate. A single blastocyst is mouth-pipetted into each well.

### 6.2. DNA Denaturation

PCR plates are briefly centrifuged and proceeded for DNA denaturation

|      |        |
|------|--------|
| 68°C | 15 min |
| 95°C | 15 min |

### 6.3 1<sup>st</sup> PCR

performed nested PCR reaction. Use Herculase II Fusion DNA Polymerase.

|                             |       |                             |
|-----------------------------|-------|-----------------------------|
| Nested PCR for Rosa26 locus | R26F1 | CCAAAGTCGCTCTGAGTTGTTATCAGT |
|                             | R26R1 | GGAGCGGGAGAAATGGATATGAAG    |

| 1 <sup>st</sup> PCR | In 25µl PCR                     |
|---------------------|---------------------------------|
| Denatured DNA       | 3 (Blastocyst) or 5 µl (Morula) |
| 5x buffer           | 5                               |
| dNTP                | 0.25                            |
| Primer For          | 0.5                             |
| Primer Rev          | 0.5                             |
| DNA polymerase      | 0.3                             |
| H <sub>2</sub> O    | Up to 25                        |

98°C 3min; 35 cycles of [95°C-20s; 60°C-20s; 72°C-20s]; 72°C-3 min

#### 6.4 2<sup>nd</sup> PCR

|                             |       |                         |
|-----------------------------|-------|-------------------------|
| Nested PCR for Rosa26 locus | R26F2 | GCCTCCTGGCTTCTGAGGACCG  |
|                             | R26R2 | TCTGTGGGAAGTCTTGTCCCTCC |

| 2 <sup>nd</sup> PCR         | In 25µl PCR |
|-----------------------------|-------------|
| 1 <sup>st</sup> PCR product | 2           |
| 5x buffer                   | 5           |
| dNTP                        | 0.25        |
| Primer For                  | 0.5         |
| Primer Rev                  | 0.5         |
| DNA polymerase              | 0.3         |
| H <sub>2</sub> O            | Up to 25    |

98°C 3min; 35 cycles of [95°C-20s; 60°C-20s; 72°C-20s]; 72°C-3 min

PCR products are purified using PCR extraction kit

Product = **196 bp** (Xbal digested: 115 + 85 bp)

### III. Plasmid maps

#### Plasmid pCAG-Cas9-162A

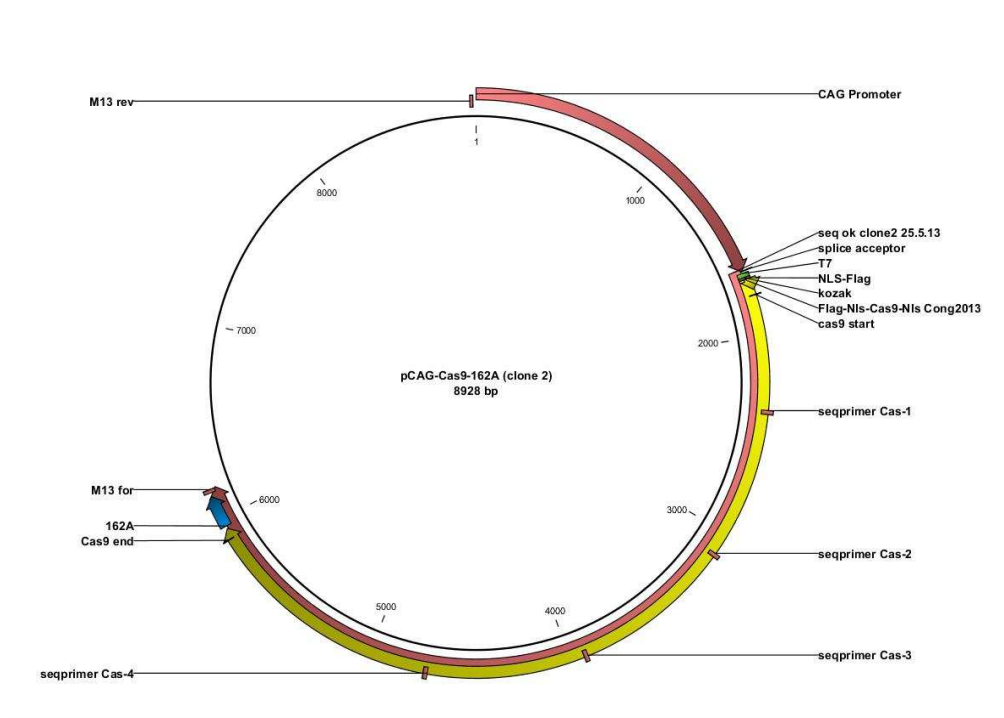

```

LOCUS       pCAG-Cas9-162A_(clone_2)          8928 bp    DNA     circular UNA
18-APR-2013
ACCESSION   pCAG-cre-bpA
COMMENT     This file is created by vector NTI
            http://www.invitrogen.com/
FEATURES             Location/Qualifiers
     misc_feature    1..1671
                     /vntifkey="21"
                     /label="CAG Promoter"
                     /note="Oriinal location: 87..1753"
     misc_feature    1660..6162
                     /label="seq ok clone2 25.5.13"
     misc_feature    1670..1671
                     /vntifkey="21"
                     /label="splice acceptor"
                     /note="Oriinal location: 1752..1753"
     misc_feature    1681..5949
                     /note="originates from pCAG-Cas9-bpA_PacI_MluI"
                     /label=Insert
     misc_feature    1681..5949
                     /note="originates from pCAG-Cas9-96A (clone
15)_PacI_MluI"
                     /label=Insert
     promoter        1681..1703
                     /label=T7
     Region          1704..1712
                     /label=kozak
     misc_feature    1704..1712
                     /label=kozak
     CDS             1713..5948
                     /label="Flag-Nls-Cas9-Nls Cong2013"
     CDS             1713..1772
                     /label=NLS-Flag
     CDS             1797..1799
                     /label="cas9 start"

```

```

primer      2366..2385
            /label="seqprimer Cas-1"
primer      3109..3128
            /label="seqprimer Cas-2"
primer      3908..3927
            /label="seqprimer Cas-3"
primer      4704..4724
            /label="seqprimer Cas-4"
CDS         5895..5897
            /label="Cas9 end"
polyA_site  5962..6123
            /vntifkey="26"
            /label=163-166A
            /label=162A
misc_feature complement(6143..6159)
            /vntifkey="21"
            /label="M13 for"
misc_feature 8898..8913
            /vntifkey="21"
            /label="M13 rev"

```

ORIGIN

```

1  GACATTGATT ATTGACTAGT TATTAATAGT AATCAATTAC GGGGTCATTA GTTCATAGCC
61 CATATATGGA GTTCCGCGTT ACATAACTTA CGGTAAATGG CCCGCCTGGC TGACCGCCCA
121 ACGACCCCGG CCCATTGACG TCAATAATGA CGTATGTTCC CATAGTAACG CCAATAGGGA
181 CTTTCCATTG ACGTCAATGG GTGGAGTATT TACGGTAAAC TGCCCACTTG GCAGTACATC
241 AAGTGTATCA TATGCCAAGT ACGCCCCCTA TTGACGTCAA TGACGGTAAA TGGCCCCGCT
301 GGCATTATGC CCAGTACATG ACCTTATGGG ACTTTCCTAC TTGGCAGTAC ATCTACGTAT
361 TAGTCATCGC TATTACCATG GTCGAGGTGA GCCCCACGTT CTGCTTCACT CTCCCCATCT
421 CCCCCCCTC CCCACCCCA ATTTTGTATT TATTTATTTT TTAATTATTT TGTGCAGCGA
481 TGGGGGCGGG GGGGGGGGGG GGGCGCGCGC CAGGCGGGGC GGGGCGGGGC GAGGGGCGGG
541 GCGGGGCGAG GCGGAGAGGT GCGGCGGCAG CCAATCAGAG CGGCGCGCTC CGAAAGTTTC
601 CTTTTATGGG GAGGCGGCGG CGGCGGCGGC CCTATAAAAA GCGAAGCGCG CGGCGGGCGG
661 GAGTCGCTGC GTCGCGCCTT CGCCCCGTGC CCCGCTCCGC CGCCGCCCCG
721 CCGGCTCTG ACTGACCGCG TTACTCCAC AGGTGAGCGG GCGGGACGGC CTTTCTCTC
781 CGGGCTGTAA TTAGCGCTTG GTTTAATGAC GGCTCGTTT TTTTCTGTGG CTGCGTGA
841 GCCTTAAAGG GCTCCGGGAG GGCCCTTTGT GCGGGGGGGA GCGGCTCGGG GGGTGCCTGC
901 GTGTGTGTGT GCGTGGGGAG CGCCGCGTGC GGCCCGCGCT GCCCGGCGGC TGTGAGCGCT
961 GCGGGGCGCG CGCGGGGCTT TGTGCGCTCC GCGTGTGCGC GAGGGGAGCG CGGCGGGGGG
1021 CGGTGCCCGG GGGTGCGGGG GGGTGCAGAG GGAACAAAG GCTGCGTGCG GGTGTGTGTC
1081 GTGGGGGGGT GAGCAGGGGG TGTGGGCGCG GCGGTCGGGC TGTAACCCCC CCCTGCACCC
1141 CCCTCCCCGA GTTGCTGAGC ACGGCCCGGC TTCGGGTGCG GGGCTCCGTG CGGGGCGTGG
1201 CGCGGGGCTC GCCGTGCCGG GCGGGGGGTG GCGGCAGGTG GGGGTGCCGG GCGGGGCGGG
1261 GCCGCTCGG GCCGGGGAGG GCTCGGGGGA GGGGCGCGGC GGCCCCGGAG CGCCGGCGGC
1321 TGTCGAGGCG CGGCGAGCCG CAGCCATTGC CTTTTATGGT AATCGTGCGA GAGGCGCAG
1381 GGACTTCCTT TGTCCCAAAT CTGGCGGAG CGAAATCTGG GAGGCGCCG CGCACCCCT
1441 CTAGCGGGCG CGGGCGAAGC GGTGCGGCGC CGGCAGGAAG GAAATGGGCG GGGAGGGCCT
1501 TCGTGCCTCG CCGCGCCGCC GTCCCTTCT CCATCTCCAG CCTCGGGGCT GCCGCAGGGG
1561 GACGGCTGCC TTCGGGGGGG ACGGGGCAGG GCGGGGTTCG GTTCTGGCG TGTGACCGGC
1621 GGCTCTAGAG CCTCTGCTAA CCATGTTTCT GCCTTCTTCT TTTTCTTACA GATCCTTAA
1681 TAATAATACG ACTCACTATA GGGGcgcgcca ccATGGGACC TAAGAAAAAG AGGAAGGTGG
1741 CGGCCGCTGA CTACAAGGAT GACGACGATA AAGGTATCCA CGGAGTCCCA CGAGCCGACA
1801 AGAAGTACAG CATCGGCCTG GACATCGGCA CCAACTCTGT GGGCTGGGCC GTGATCACCG
1861 ACGAGTACAA GGTGCCCAGC AAGAAATTCA AGGTGCTGGG CAACACCGAC CGGCACAGCA
1921 TCAAGAAGAA CCTGATCGGA GCCCTGCTGT TCGACAGCGG CGAAACAGCC GAGGCCACCC
1981 GGCTGAAGAG AACCGCCAGA AGAAGATACA CCAGACGGAA GAACCGGATC TGCTATCTGC
2041 AAGAGATCTT CAGCAACGAG ATGGCCAAGG TGGACGACAG CTTCTTCCAC AGACTGGAAG
2101 AGTCCTTCTT GGTGGAAGAG GATAAGAAGC ACGAGCGGCA CCCCATCTTC GGCAACATCG
2161 TGGACGAGGT GGCCTACCAC GAGAAGTACC CCACCATCTA CCACCTGAGA AAGAACTGG
2221 TGGACAGCAC CGACAAGGCC GACCTGCGGC TGATCTATCT GGCCCTGGCC CACATGATCA
2281 AGTTCCGGGG CCACTTCTCT ATCGAGGGCG ACCTGAACCC CGACAACAGC GACGTGGACA
2341 AGCTGTTTCT CCAGCTGGTG CAGACCTACA ACCAGCTGTT CGAGGAAAAC CCCATCAACG
2401 CCAGCGGCGT GGACGCCAAG GCCATCTGT CTGCCAGACT GAGCAAGAGC AGACGGCTGG
2461 AAAATCTGAT CGCCCAGCTG CCCGCGGAGA AGAAGAATGG CCTGTTCCGG AACCTGATTG
2521 CCCTGAGCCT GGGCCTGACC CCCAACTTCA AGAGCAACTT CGACCTGGCC GAGGATGCCA
2581 AACTGCAGCT GAGCAAGGAC ACCTACGACG ACGACCTGGA CAACCTGCTG GCCCAGATCG
2641 GCGACCAGTA CGCCGACCTG TTTCTGGCCG CCAAGAACCT GTCCGACGCC ATCCTGCTGA
2701 GCGACATCCT GAGAGTGAAC ACCGAGATCA CCAAGGCCCC CCTGAGCGCC TCTATGATCA
2761 AGAGATACGA CGAGCACACC CAGGACCTGA CCCTGCTGAA AGCTCTGTTG CGGCAGCAGC
2821 TGCTGTAGAA GTACAAAGAG ATTTTCTTCG ACCAGAGCAA GAACGCTAC GCGCGTACA
2881 TTGACGGCGG AGCCAGCCAG GAAGAGTTCT ACAAGTTCAT CAAGCCCATC CTGGAAAAGA

```

2941 TGGACGGCAC CGAGGAACTG CTCGTGAAGC TGAACAGAGA GGACCTGCTG CGGAAGCAGC  
3001 GGACCTTCGA CAACGGCAGC ATCCCCCACC AGATCCACCT GGGAGAGCTG CACGCCATTC  
3061 TGCGGCGGCA GGAAGATTTT TACCCATTCC TGAAGGACAA CCGGGAAGAG ATCGAGAAGA  
3121 TCCTGCACCT CCGCATCCCC TACTACTGGG GCCCTCTGGC CAGGGGAAAC AGCAGATTCCG  
3181 CCTGGATGAC CAGAAAGAGC GAGGAAACCA TCACCCCTG GAACTTCGAG GAAGTGGTGG  
3241 ACAAGGGGCG TTCCGCCAG AGCTTCATCG AGCGGATGAC CAACTTCGAT AAGAACCTGC  
3301 CCAACGAGAA GGTGCTGCCC AAGCACAGCC TGCTGTACGA GTACTTCACC GTGTATAACG  
3361 AGCTGACCAA AGTGAAATAC GTGACCGAGG GAATGAGAAA GCCCGCCTTC CTGAGCGGCG  
3421 AGCAGAAAAA GGCCATCGTG GACCTGCTGT TCAAGACCAA CCGGAAAGTG ACCGTGAAGC  
3481 AGCTGAAAGA GGACTACTTC AAGAAAATCG AGTGCTTCGA CTCCGTGGAA ATCTCCGGCG  
3541 TGGAAGATCG GTTCAACGCC TCCCTGGGCA CATACCACGA TCTGCTGAAA ATTATCAAGG  
3601 ACAAGGACTT CCTGGACAAT GAGGAAAACG AGGACATTCT GGAAGATATC GTGCTGACCC  
3661 TGACACTGTT TGAGGACAGA GAGATGATCG AGGAAACGGCT GAAAACCTAT GCCCACCTGT  
3721 TCGACGACAA AGTGATGAAG CAGTGAAAGC GCGGAGATA CACCGGCTGG GGCAGGCTGA  
3781 CCGGAGAGCT GATCAACGGC ATCCGGGACA AGCAGTCCGG CAAGACAATC CTGGATTCC  
3841 TGAAGTCCGA CGGCTTCGCC AACAGAAACT TCATGCAGCT GATCCACGAC GACAGCCTGA  
3901 CCTTTAAAGA GGACATCCAG AAAGCCCAGG TGTCCGGCCA GGGCGATAGC CTGCACGAGC  
3961 ACATTGCCAA TCTGGCCGGC AGCCCCGCCA TTAAGAAGGG CATCTGCAG ACAGTGAAGG  
4021 TGGTGGACGA GCTCGTGAAA GTGATGGGCC GGCACAAGCC CGAGAACATC GTGATCGAAA  
4081 TGGCCAGAGA GAACCAGACC ACCCAGAAGG GACAGAAGAA CAGCCGCGAG AGAATGAAGC  
4141 GGATCCAAAG GACTGCGGCA GAGCTGGGCA GCCAGATCCT GAAAGAACAC CCGGTGAAA  
4201 ACACCCAGCT GCAGAACGAG AAGCTGTACC TGTACTACCT GCAGAATGGG CGGGATATGT  
4261 ACGTGGACCA GGAAGTGGAC ATCAACCGGC TGTCCGACTA CGATGTGGAC CATATCGTGC  
4321 CTCAGAGCTT TCTGAAGGAC GACTCCATCG ACAACAAGGT GCTGACCAGA AGCGACAAGA  
4381 ACCGGGGCAA GAGCGACAAC GTGCCCTCCG AAGAGTTCGT GAAGAAGATG AAGAACTACT  
4441 GCGGCGAGCT GGTGAACGCC AAGCTGATTA CCCAGAGAAA GTTCGACAAT CTGACCAAGG  
4501 CCGAGAGAGG CGGCTGAGC GAGCTGGATA AGGCCGGCTT CATCAAGAGA CATCGATTGG  
4561 AAACCCGGCA GATCACAAGG CACGTGGCAC AGATCCTGGA CTCCCGGATG AACACTAAGT  
4621 ACGACGAGAA TGACAAGCTG ATCCGGGAAG TGAAAAGTAT CACCCTGAAG TCCAAGCTGG  
4681 TGTCCGATTT CCGGAAGGAT TTCCAGTTTT ACAAAAGTGC CGAGATCAAC AACTACCACC  
4741 ACGCCACCGA CGCCTACCTG AACGCCGTCG TGGGAACCGC CCTGATCAAA AAGTACCCTA  
4801 AGTGGAAAAG CGAGTTCGTG TACGGCGACT ACAAGGTGTA CGACGTGCGG AAGATGATCG  
4861 CCAAGAGCGA GCAGGAAATC GGCAAGGCTA CCGCCAAGTA CTTCTTCTAC AGCAACTCA  
4921 TGAACTTTTT CAAGACCGAG ATTACCTGG CCAACGGCGA GATCCGGAAG CGGCCTCTGA  
4981 TCGAGACAAA CGGCGAAACC GGGGAGATCG TGTGGGATAA GGGCCGGGAT TTTGCCACCG  
5041 TGCGGAAAGT GCTGAGCATG CCCCAAGTGA ATATCGTGAA AAAGACCGAG GTGCAGACAG  
5101 GCGGCTTCAG CAAAGAGTCT ATCCTGCCCA AGAGGAAACAG CGATAAGCTG ATCGCCAGAA  
5161 AGAAGGACTG GGACCCTAAG AAGTACGGCG GCTTCGACAG CCCCACCGTG GCCTATTCTG  
5221 TGCTGGTGGT GGCCAAAGTG GAAAAGGGCA AGTCCAAGAA ACTGAAGAGT GTGAAAGAGC  
5281 TGCTGGGGAT CACCATCATG GAAAAGAGCA GCTTCGAGAA GAATCCCATC GACTTTCTGG  
5341 AAGCCAAGGG CTACAAAGAA GTGAAAAAGG ACCTGATCAT CAAGCTGCCT AAGTACTCCC  
5401 TGTTTCGAGT GGAAAACGGC CGGAAGAGAA TGCTGGCCTC TGCCGGCGAA CTGCAGAAGG  
5461 GAAACGAACT GGCCCTGCCC TCCAAATATG TGAATTCTCT GTACCTGGCC AGCCACTATG  
5521 AGAAGCTGAA GGGCTCCCC GAGGATAATG AGCAGAAAACA GCTGTTTTGTG GAACAGCACA  
5581 AAGACTACCT TAGCGGCGCA ATCGAGAGA TCAGCGAGTT CTCAAGAGA AGCACTCTGG  
5641 CCGACGCTAA TCTGGACAAA GTGCTGTCCG CCTACAACAA GCACCGGGAT AAGCCCATCA  
5701 GAGAGCAGGC CGAGAATATC ATCCACCTGT TTACCCTGAC CAATCTGGGA GCCCCTGCCG  
5761 CCTTCAAGTA CTTTGACACC ACCATCGACC GGAAGAGGTA CACCAGCACC AAAGAGGTGC  
5821 TGGACGCCAC CCTGATCCAC CAGAGCATCA CCGGCCTGTA CGAGACACGG ATCGACCTGT  
5881 CTCAGCTGGG AGGCGACAAG CGTCTGTCTG CTAATAAGAA AGCTGGTCAA GCTAAGAAAA  
5941 AAGAAATGAAC GCGTCTTAAA TAAAAAATAA AAAAAAAAAA AAAAAAAAAA AAAAAAAAAA  
6001 AAAAAAAAAA AAAAAAAAAA AAAAAAAAAA AAAAAAAAAA AAAAAAAAAA AAAAAAAAAA  
6061 AAAAAAAAAA AAAAAAAAAA AAAAAAAAAA AAAAAAAAAA AAAAAAAAAA AAAAAAAAAA  
6121 AAAGCGATCG CGGGCGGCCG CCACTGGCCG TCGTTTTACA ACGTCTGTAC TGGGAAAACC  
6181 CTGGCGTTAC CCAACTTAAT CGCCTTGACG CACATCCCCC TTTCGCCAGC TGGCGTAATA  
6241 GCGAAGAGGC CCGCACCGAT CGCCCTTCCC AACAGTTGCG CAGCCTGAAT GGCGAATGGG  
6301 ACGCGCCCTG TAGCGGCGCA TTAAGCGCGG CGGGTGTGGT GGTTACGCGC AGCGTGACCG  
6361 CTACACTTGC CAGCGCCCTA GCGCCCGCTC CTTTCGCTTT CTTCCCTTCC TTTCTCGCCA  
6421 CGTTTCGCCG CTTTCCCGGT CAAGCTCTAA ATCGGGGGCT CCCTTTAGGG TTCCGATTTA  
6481 GTGCTTTACG GCACCTCGAC CCCAAAAAAC TTGATTAGGG TGATGGTTCA CGTAGTGGGC  
6541 CATCGCCCTG ATAGACGGTT TTTTCGCCCT TGACGTTGGA GTCCACGTTT TTTAATAGTG  
6601 GACTCTTGTT CCAAAGTGGG ACAACACTCA ACCCTATCTC GGTCTATTCT TTTGATTTAT  
6661 AAGGGATTTT GCCGATTTTC GCCTATTGTT TAAAAAATGA GCTGATTTAA CAAAAATTTA  
6721 ACGCGAATTT TAACAAAATA TTAACGCTTA CAATTTAGGT GGCACTTTTT GGGGAAATGT  
6781 GCGCGGAACC CCTATTTGTT TATTTTTCTA AATACATTCA AATATGTATC CGCTCATGAG  
6841 ACAATAACCC TGATAAATGC TTCAATAATA TTGAAAAAGG AAGAGTATGA GTATTCAACA  
6901 TTTCCGTGTC GCCCTTATTC CCTTTTTTGC GGCATTTTGC CTTCTGTTT TTTGCTACCC  
6961 AGAAAACGCT GTGAAAGTAA AAGATGCTGA AGATCAGTTG GGTGCACGAG TGGGTTACAT  
7021 CGAACTGGAT CTAACAGCG GTAAAGTCTT TGAGAGTTTT CGCCCCAAG AACGTTTTCC  
7081 AATGATGAGC ACTTTTAAAG TTCTGCTATG TGGCGCGGTA TTATCCCGTA TTGACGCCGG

|      |            |             |             |            |             |            |
|------|------------|-------------|-------------|------------|-------------|------------|
| 7141 | GCAAGAGCAA | CTCGGTCGCC  | GCATACACTA  | TTCTCAGAAT | GACTTG GTTG | AGTACTCACC |
| 7201 | AGTCACAGAA | AAGCATCTTA  | CGGATGGCAT  | GACAGTAAGA | GAATTATGCA  | GTGCTGCCAT |
| 7261 | AACCATGAGT | GATAACACTG  | CGGCCAACTT  | ACTTCTGACA | ACGATCGGAG  | GACCGAAGGA |
| 7321 | GCTAACCGCT | TTTTTGCACA  | ACATGGGGGA  | TCATGTAACT | CGCCTTGATC  | GTTGGGAACC |
| 7381 | GGAGCTGAAT | GAAGCCATAC  | CAAACGACGA  | GCGTGACACC | ACGATGCCTG  | TAGCAATGGC |
| 7441 | AACAACGTTG | CGCAAACATAT | TAAGTGGCGA  | ACTACTTACT | CTAGCTTCCC  | GGCAACAATT |
| 7501 | AATAGACTGG | ATGGAGGCGG  | ATAAAGTTGC  | AGGACCACTT | CTGCGCTCGG  | CCCTTCCGGC |
| 7561 | TGGCTGGTTT | ATTGCTGATA  | AATCTGGAGC  | CGGTGAGCGT | GGGTCTCGCG  | GTATCATTGC |
| 7621 | AGCACTGGGG | CCAGATGGTA  | AGCCCTCCCG  | TATCGTAGTT | ATCTACACGA  | CGGGGAGTCA |
| 7681 | GGCAACTATG | GATGAACGAA  | ATAGACAGAT  | CGCTGAGATA | GGTGCCTCAC  | TGATTAAGCA |
| 7741 | TTGGTAACTG | TCAGACCAAG  | TTTACTCATA  | TATACTTTAG | ATTGATTTAA  | AACTTCATTT |
| 7801 | TTAATTTAAA | AGGATCTAGG  | TGAAGATCCT  | TTTTGATAAT | CTCATGACCA  | AAATCCCTTA |
| 7861 | ACGTGAGTTT | TCGTTCCACT  | GAGCGTCAGA  | CCCCGTAGAA | AAGATCAAAG  | GATCTTCTTG |
| 7921 | AGATCCTTTT | TTTCTGCGCG  | TAATCTGCTG  | CTTGCAAACA | AAAAAACCAC  | CCGCTACCAG |
| 7981 | CGGTGGTTTT | TTTGCCGGAT  | CAAGAGCTAC  | CAACTCTTTT | TCCGAAGGTA  | ACTGGCTTCA |
| 8041 | GCAGAGCGCA | GATACCAAAT  | ACTGTTCTTC  | TAGTGTAGCC | GTAGTTAGGC  | CACCACTTCA |
| 8101 | AGAACTCTGT | AGCACCGCCT  | ACATACCTCG  | CTCTGCTAAT | CCTGTTACCA  | GTGGCTGCTG |
| 8161 | CCAGTGGCGA | TAAGTCGTGT  | CTTACCGGGT  | TGGACTCAAG | ACGATAGTTA  | CCGGATAAGG |
| 8221 | CGCAGCGGTC | GGGCTGAACG  | GGGGGTTTCGT | GCACACAGCC | CAGCTTGGAG  | CGAACGACCT |
| 8281 | ACACCGAACT | GAGATACCTA  | CAGCGTGAGC  | TATGAGAAAG | CGCCACGCTT  | CCCGAAGGGA |
| 8341 | GAAAGGCGGA | CAGGTATCCG  | GTAAGCGGCA  | GGGTCGGAAC | AGGAGAGCGC  | ACGAGGGAGC |
| 8401 | TTCCAGGGGG | AAACGCCTGG  | TATCTTTATA  | GTCCTGTCGG | GTTTCGCCAC  | CTCTGACTTG |
| 8461 | AGCGTCGATT | TTTGTGATGC  | TCGTCAGGGG  | GGCGGAGCCT | ATGGAAAAAC  | GCCAGCAACG |
| 8521 | CGGCCTTTTT | ACGGTTCCTG  | GCCTTTTGCT  | GGCCTTTTGC | TCACATGTTC  | TTTCCTGCGT |
| 8581 | TATCCCCTGA | TTCTGTGGAT  | AACCGTATTA  | CCGCCTTTGA | GTGAGCTGAT  | ACCGCTCGCC |
| 8641 | GCAGCCGAAC | GACCGAGCGC  | AGCGAGTCAG  | TGAGCGAGGA | AGCGGAAGAG  | CGCCCAATAC |
| 8701 | GCAAACCGCC | TCTCCCCGCG  | CGTTGGCCGA  | TTCATTAATG | CAGCTGGCAC  | GACAGGTTTC |
| 8761 | CCGACTGGAA | AGCGGGCAGT  | GAGCGCAACG  | CAATTAATGT | GAGTTAGCTC  | ACTCATTAGG |
| 8821 | CACCCCAGGC | TTTACACTTT  | ATGCTTCCGG  | CTCGTATGTT | GTGTGGAATT  | GTGAGCGGAT |
| 8881 | AACAATTTCA | CACAGGAAAC  | AGCTATGACC  | ATGAGGCGCG | CCGGATTC    |            |

//

## Plasmid pU6-sgRosa26-1\_CBh-Cas9-T2A-BFP (Addgene #64214)

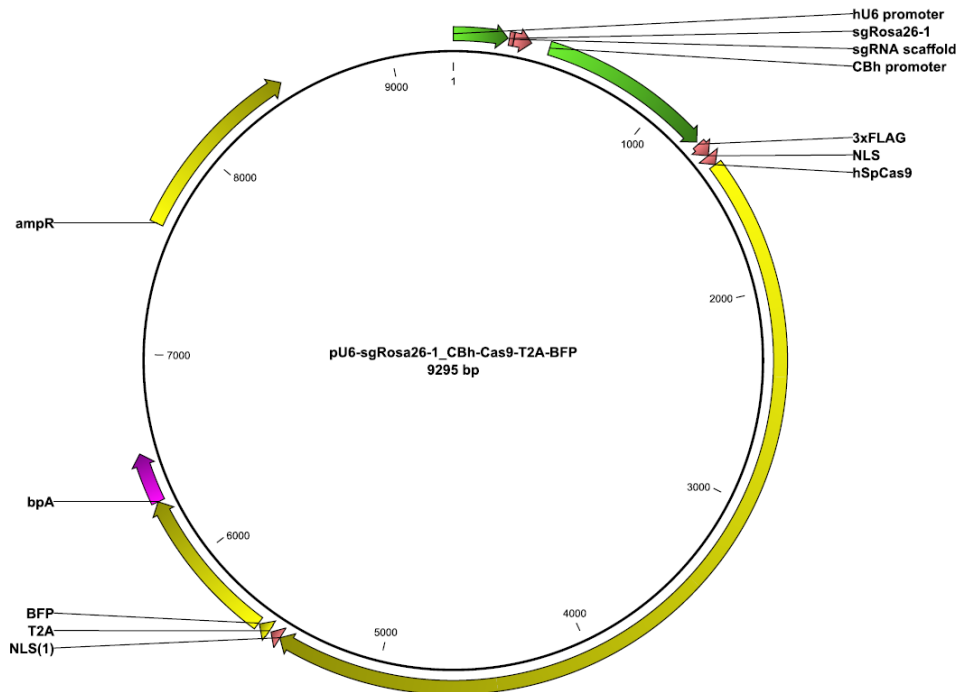

```

LOCUS       pU6-sgRosa26-1_CBh-Cas9-T2A-BFP          9295 bp    DNA
circular   UNA_09-MAY-2014
DEFINITION .
ACCESSION .
VERSION .
SOURCE     . (unknown)
  ORGANISM .
  .
COMMENT
FEATURES             Location/Qualifiers
     promoter         1..249
                       /label=hU6
                       /label="hU6 promoter"
     misc_feature     256..276
                       /label=sgRosa26-1
     misc_feature     277..358
                       /label="Guide RNA"
                       /label="sgRNA scaffold"
     promoter         443..1241
                       /label=CBh
                       /label="CBh promoter"
     misc_feature     1254..1322
                       /label=3xFLAG
     misc_feature     1323..1373
                       /label=NLS
     CDS              1374..5474
                       /label=hSpCas9
     misc_feature     5475..5522
                       /label=NLS(1)
     CDS              5532..5586
                       /label=T2A
     CDS              5592..6311
  
```

```

polyA_signal  /label=BFP
               6312..6543
               /label=pGHPA
CDS           /label=bpA
               7615..8475
               /label=ampR
ORIGIN
1  CCCCACGAGG GCCTATTTCC CATGATTCCT TCATATTTGC ATATACGATA CAAGGCTGTT
61 AGAGAGATAA TTGGAATTA TTTGACTGTA AACACAAAGA TATTAGTACA AAATACGTGA
121 CGTAGAAAGT AATAATTTCT TGGGTAGTTT GCAGTTTTAA AATTATGTTT TAAAATGGAC
181 TATCATATGC TTACCGTAAC TTGAAAGTAT TTCGATTTCT TGGCTTTATA TATCTTGTGG
241 AAAGGACGAA ACACCGACTC CAGTCTTTCT AGAAGAGTTT TAGAGCTAGA AATAGCAAGT
301 TAAAATAAGG CTAGTCCGTT ATCAACTTGA AAAAGTGGCA CCGAGTCGGT GCTTTTTTGT
361 TTTAGAGCTA GAAATAGCAA GTTAAAATAA GGCTAGTCCG TTTTATAGCG GTGCGCCAAT
421 TCTGCAGACA AATGGCTCTA GAGGTACCCG TTACATAACT TACGGTAAAT GGCCCGCTG
481 GCTGACCGCC CAACGACCCC CGCCCATTGA CGTCAATAGT AACGCCAATA GGGACTTTCC
541 ATTGACGTCA ATGGGTGGAG TATTTACGGT AAAGTCCCA CTTGGCAGTA CATCAAGTGT
601 ATCATATGCC AAGTACGCCC CCTATTGACG TCAATGACGG TAAATGGCCC GCCTGGCATT
661 GTGCCCAGTA CATGACCTTA TGGGACTTTC CTACTTGGCA GTACATCTAC GTATTAGTCA
721 TCGCTATTAC CATGGTCGAG GTGAGCCCCA CGTTCTGCTT CACTCTCCCC ATCTCCCCC
781 CCTCCCCACC CCCAATTTTG TATTTATTTA TTTTTTAATT ATTTTGTGCA GGTATGGGG
841 CGGGGGGGGG GGGGGGGCGC GCGCCAGGCG GGGCGGGGCG GGGCGAGGGG CGGGGCGGGG
901 CGAGGCGGAG AGGTGCGGCG GCAGCCAATC AGAGCGGCGC GCTCCGAAAG TTTCTTTTA
961 TGGCGAGGCG GCGGCGGCGG CGGCCCTATA AAAAGCGAAG CGCGCGGCGG GCGGGAGTCG
1021 CTGCGACGCT GCCTTCGCCC CGTGCCCCGC TCCGCCGCGG CCTCGCGCCG CCCGCCCGG
1081 CTCTGACTGA CCGCGTACT CCCACAGGTG AGCGGGCGGG ACGGCCCTTC TCCTCCGGG
1141 TGTAATTAGC TGAGCAAGAG GTAAGGTTT GTAGGATGGT TGGTTGGTGG GGTATTAATG
1201 TTTAATTACC TGGAGCACCT GCCTGAAATC ACTTTTTTTC AGTTTGGACC GGTGCCACCA
1261 TGGACTATAA GGACCACGAC GGAGACTACA AGGATCATGA TATTGATTAC AAAGACGATG
1321 ACGATAAGAT GGCCCCAAAG AAGAAGCGGA AGTTCGGTAT CCACGGAGTC CCAGCAGCCG
1381 ACAAGAAGTA CAGCATCGGC CTGGACATCG GCACCAACTC TGTGGGCTGG GCCGTGATCA
1441 CCGACGAGTA CAAGGTGCC AGCAAGAAAT TCAAGGTGCT GGGCAACACC GACCGGCACA
1501 GCATCAAGAA GAACCTGATC GGAGCCCTGC GTTTCGACAG TGCCGAAACA CGGAGGCCCA
1561 CCCGGCTGAA GAGAACC GCCGAGAGAT ACACCAAGCG GAAGAACC GGATCTGCTATC
1621 TGCAAGAGAT CTTAGCAAC GAGATGGCCA AGGTGGACGA CAGTCTTCTC CACAGACTGG
1681 AAGAGTCCTT CCTGGTGGAA GAGGATAAGA AGCACGAGCG GCACCCCATC TTCGGCAACA
1741 TCGTGGACGA GGTGGCCTAC CACGAGAAGT ACCCCACCAT CTACCACCTG AGAAAGAAAC
1801 TGGTGGACAG CACCGACAAG GCCGACCTGC GGCTGATCTA TCTGGCCCTG GCCCAGTGA
1861 TCAAGTCCG GGGCCACTTC CTGATCGAGG CCGACCTGAA CCCCAGCAAC CCGAGCTGG
1921 ACAAGCTGTT CATCCAGCTG GTGCAGACCT ACAACCAGCT GTTCGAGGAA AACCCCATCA
1981 ACGCCAGCGG CGTGGACGCC AAGGCCATCC TGTCTGCCAG ACTGAGCAAG AGCAGACGGC
2041 TGGAAAATCT GATCGCCCAG CTGCCCGGCG AGAAGAAGAA TGGCCTGTTC GGAAACCTGA
2101 TTGCCCTGAG CCTGGGCCTG ACCCCCAACT TCAAGAGCAA CTTCGACCTG GCCGAGGATG
2161 CCAAAGTGA GCTGAGCAAG GACACCTACG ACGACGACCT GGACAACCTG CTGGCCAGA
2221 TCGGCCGACA GTACGCCGAC CTGTTTCTGG CCGCCAAGAA CCTGTCCGAC GGCATCTGCG
2281 TGAGCGACAT CCTGAGAGTG AACACCGAGA TCACCAAGGC CCCCCTGAGC GCCTCTATGA
2341 TCAAGAGATA CGACGAGCAC CACCAGGACC TGACCCTGCT GAAAGCTCTC GTGCGGCAGC
2401 AGCTGCCTGA GAAGTACAAA GAGATTTTCT TCGACCAGAG CAAGAACGGC TACGCCGGCT
2461 ACATTGACGG CGGAGCCAGC CAGGAAGAGT TCTACAAGTT CATCAAGCCC ATCCTGGAAG
2521 AGATGGACCG CACCGAGGAA CTGCTCGTGA AGCTGAACAG AGAGGACCTG CTGCGGAAGC
2581 AGCGGACCTT CGACAACGGC AGCATCCCCC ACCAGATCCA CCTGGGAGAG CTGCAAGCCA
2641 TTCTGCGGCG GCAGGAAGAT TTTTACCCAT TCCTGAAGGA CAACCGGAA AAGATCGAGA
2701 AGATCCTGAC CTTCCGCATC CCCTACTACG TGGGCCCTCT GGCCAGGGGA AACAGCAGAT
2761 TCGCCTGGAT GACCAGAAAG AGCGAGGAAA CCATCACCCC CTGGAACCTC GAGGAAGTGG
2821 TGGACAAGGG CGCTTCCGCC CAGAGCTTCA TCGAGCGGAT GACCAACTTC GATAAGAACC
2881 TGCCCAACGA GAAGGTGCTG CCCAAGCACA GCCTGCTGTA CGAGTACTTC ACCGTGTATA
2941 ACGAGCTGAC CAAAGTGAAA TACGTGACCG AGGGAATGAG AAAGCCCGC TTCTGAGCG
3001 GCGAGCAGAA AAAGGCCATC GTGGACCTGC TGTTCAAGAC CAACCGGAAA GTGACCGTGA
3061 AGCAGCTGAA AGAGGACTAC TTCAAGAAAA TCGAGTGCTT CACTCCGTG GAAATCTCCG
3121 GCGTGAAGA TCGGTTCAAC GCCTCCCTGG GCACATACCA CGATCTGCTG AAAATTATCA
3181 AGGACAAGGA CTTCTGGAC AATGAGGAAA ACGAGGACAT TCTGGAAGAT ATCGTGCTGA
3241 CCCTGACACT GTTTGAGGAC AGAGAGATGA TCGAGGAACG GCTGAAAACC TATGCCACC
3301 TGTTTCGACGA CAAAGTGATG AAGCAGCTGA AGCGGCGGAG ATACACCAGC TGGGCGAGC
3361 TGAGCCGAA GCTGATCAAC GGCATCCGGG ACAAGCAGTC CGGCAAGACA ATCCTGGATT
3421 TCCTGAAGTC CGACGGCTTC GCCAACAGAA ACTTCATGCA GCTGATCCAC GACGACAGCC
3481 TGACCTTTAA AGAGGACATC CAGAAAGCCC AGGTGTCCGG CCAGGGCGAT AGCCTGCACG
3541 AGCACATTGC CAATCTGGCC GGCAGCCCCG CCATTAAGAA GGGCATCCTG CAGACAGTGA
3601 AGTGGTGGCA CGAGCTCGTG AAAGTATGAG GCCGGCACA GCCCGAGAAC ATCGTGATCG
3661 AAATGGCCAG AGAGAACCAG ACCACCCAGA AGGGACAGAA GAACAGCCCG GAGAGAATGA
3721 AGCGGATCGA AGAGGGCATC AAAGAGCTGG GCAGCCAGAT CCTGAAAGAA CACCCCGTGG

```



3781 AAAACACCCA GCTGCAGAAC GAGAAGCTGT ACCTGTAATA CCTGCAGAAT GGGCGGGATA  
3841 TGTACGTGGA CCAGGAATAG GACATCAACC GGCTGTCCGA CTACGATGTG GACCATATCG  
3901 TGCTCTAGAG CTTTCTGAAG GACGATCCCA TCGACAACAA GGTGCTGACC AGAAGCGACA  
3961 AGAACCGGGG CAAGAGCGAC AACGTGCCCT CCGAAGAGGT CGTGAAGAGT ATGAAGAAGT  
4021 ACTGGCGGCA GCTGCTGAAC GCCAAGCTGA TTACCCAGAG AAAGTTCGAC AATCTGACCA  
4081 AGGCCGAGAG AGGCGGCCTG AGCGAACTGG ATAAGGCCGG CTTCATCAAG AGACAGCTGG  
4141 TGGAAACCCG GCAGATCACA AAGCACGTGG CACAGATCCT GGACTCCCGG ATGAACACTA  
4201 AGTACGACGA GAATGACAAG CTGATCCGGG AAGTGAAAGT GATCACCCTG AAGTCCAAGC  
4261 TGGTGTCCGA TTTCCGGAAG GATTTCCAGT TTTACAAAGT GCGCGAGATC AACAACATCC  
4321 ACCACGCCCA CGACGCCTAC CTGAACGCCG TCGTGGGAAC CGCCCTGATC AAAAAAGTACC  
4381 CTAAGCTGGA AAGCGAGTTC GTGTACGGCG ACTACAAGGT GTACGACGTG CGGAAGATGA  
4441 TCGCCAAGAG CGAGCAGGAA ATCGGCAAGG CTACCGCCAA GTACTTCTTC TACAGCAACA  
4501 TCATGAACTT TTTCAAGACC GAGATTACCC TGGCCAACGG CGAGATCCGG AAGCGGCCTC  
4561 TGATCGAGAC AAACGGCGAA ACCGGGGGAG TCGTGTGGGA TAAGGGCCGG GATTTTGCCA  
4621 CCGTCCGGAA AGTGTGAGC ATGCCCAAG TGAATATCGT GAAAAAGACC GAGGTGCAGA  
4681 CAGGCGGCTT CAGCAAAGAG TCTATCCTGC CCAAGAGGAA CAGCGATAAG CTGATCGCCA  
4741 GAAAGAAGGA CTGGGACCTT AAGAAGTACG GCGGCTTCGA CAGCCCCACC GTGGCCTATT  
4801 CTGTGCTGGT GGTGGCCAAA GTGGAAAAGG GCAAGTCCAA GAAACTGAAG AGTGTGAAAG  
4861 AGCTGCTGGG GATCACCATC ATGGAAAGAA GCAGCTTCGA GAAGAATCCC ATCGACTTTC  
4921 TGGAAAGCAA GGGTACAAA GAAGTGAAA AGGACCTGAT CATCAAGCTG CCTAAGTACT  
4981 CCCTGTCCGA GCTGGAACG GGCCGAAA GAATGCTGGC CTCTGCCGGC GAGGTGCAGA  
5041 AGGGAAACGA ACTGGCCCTG CCTCCAAAT ATGTGAACTT CCTGTACTCG GCCAGCCACT  
5101 ATGAGAAGCT GAAGGGCTCC CCCGAGGATA ATGAGCAGAA ACAGCTGTTT GTGGAACAGC  
5161 ACAAGCACTA CCTGGACGAG ATCATCGAGC AGATCAGCGA GTTCTCCAAG AGAGTGATCC  
5221 TGGCCGACGC TAATCTGGAC AAAGTGCTGT CCGCCTACAA CAAGCACCGG GATAAGCCCA  
5281 TCAGAGAGCA GGCCGAGAAT ATCATCCACC TGTTTACCCT GACCAATCTG GGAGCCCTG  
5341 CCGCTTCAA GTACTTTGAC ACCACCATG ACCGGAAGAG GTACACAGG ACCAAAGAGG  
5401 TGCTGGACGC CACCCTGATC CACCAGAGCA TCACCGGCCT GTACGAGACA CGGATCGACC  
5461 TGTCTCAGCT GGGAGGCGAC AAAAGGCCGG CGGCCACGAA AAAGGCCGGC CAGGCAAAAA  
5521 AGAAAAAGCT TGAGGGCAGA GGAAGTCTGC TAACATGCGG TGACGTGGAG GAGAATCCCG  
5581 GCCCTGCTAG CATGGTGAGC AAGGGCGAGG AGCTGTTAC CGGGGTGGTG CCCATCCTGG  
5641 TCGAGCTGGA CGGCGACGTA AACGGCCACA AGTTCAGCGT GAGGGGCGAG GGGCAGGGCG  
5701 ACTGCCACCA CGGCAAGCTG ACCCTGAAGT TCATCTGCAC CACCGCAAG CTGCCCTGTC  
5761 CTGGCCCCAC CCTCGTGACC ACCCTGAGCC ACGGCGTGCA GTGCTTCGCC CGCTACCCCG  
5821 ACCACATGAA GCAGCAGGAC TTCTTCAAGT CCGCCATGCC CGAAGGCTAC GTCCAGGAGC  
5881 GCACCATCTT CTTCAAGGAC GACGGCACCT ACAAGACCCG CGCCGAGGTG AAGTTCGAGG  
5941 GCGACACCCT GGTGAACCGC ATCGAGCTGA AGGGCGTCCA CTTCAAGGAG GACGGCAACA  
6001 TCCTGGGGCA CAAGCTGGAG TACAACCTCA ACAGCCACAA CATCTATATC ATGGCCGTCA  
6061 AGCAGAAGAA CGGCATCAAG GTGAACCTCA AGATCCGCCA CAACCTGGAG GACGGCAGCG  
6121 TGCAGCTCGC CGACCACTAC CAGCAGAAACA CCCCATCGG CGACGGCCCC GTGCTGCTGC  
6181 CCGACAGCCA CTACCTGAGC ACCCAGTCCG TGCTGAGCAA AGACCCCAAC GAGAAGCGCG  
6241 ATCACATGGT CCTGCTGGAG TTCCGCACCG CCGCCGGGAT CACTCTCGGC ATGGACGAGC  
6301 TGTACAAGTG AGAATTCTTA GAGCTCGCTG ATCAGCCTCG ACTGTGCCTT CTAGTTGCCA  
6361 GCCATCTGTT GTTTGCCCTT CCCCCTGTC TTCCTTGACC CTGGAAGGTG CCACTCCCAC  
6421 TTGCCTTTCC CGGCTATTG AGGAAAATTG ATCGCATTGT CTGAGTAGTT GACTTCTAT  
6481 TCTGGGGGGT GGGGTGGGGC AGGACAGCAA GGGGGAGGAT TGGGAAGAGA ATAGCAGGCA  
6541 TGCTGGGGAG CGGCCGAGG AACCCCTAGT GATGGAGTTG GCCACTCCCT CTCTGCGCGC  
6601 TCGCTCGCTC ACTGAGGCCG GCGGACCAA GGTGCGCCGA CGCCCGGGCT TTGCCCGGGC  
6661 GGCCTCAGTG AGCGAGCGAG CGCGCAGCTG CCTGCAGGGG CGCCTGATGC GGTATTTTCT  
6721 CTTACGCAT CTGTGCGGTA TTTCCACCCG CATACTGCAA AGCAACATA GTACGCGCCC  
6781 TGTAGCGCGC CATTAGCGGC GCGGAGTGTG GTGGTTACGC GCAGCGTGAC CGCTACACTT  
6841 GCCAGCGCCC TAGCGCCCGC TCCTTTTCGCT TTCTTCCCTT CCTTTCTCGC CACGTTCCGC  
6901 GGCTTTCCCC GTCAAGCTCT AAATCGGGGG CTCCCTTTAG GGTTCGATT TAGTGCTTTA  
6961 CGGCACCTCG ACCCCAAAAA ACTTGATTTG GGTGATGGTT CACGTAGTGG GCCATCGCCC  
7021 TGATAGACGG TTTTTCGCCC TTTGACGTTG GAGTCCACGT TCTTTAATAG TGGACTCTTG  
7081 TTCCAACACT GAACAACACT CAACCCTATC TCGGGCTATT CTTTTGATTT ATAAGGGATT  
7141 TTGCCGATTT CGGCTATTG GTTAAAAAAT GAGCTGATTT AACAAAAATT TAACGCGAAT  
7201 TTTAACAATA TATTAACGTT TACAATTTTA TGGTGCACCT TCAGTACAAT CTGCTCTGAT  
7261 GCCGCATAGT TAAGCCAGCC CCGACACCCG CCAACACCCG CTGACGCGCC CTGACGGGCT  
7321 TGTCTGCTCC CGGCATCCGC TTACAGACAA GCTGTGACCG TCTCCGGGAG CTGCATGTGT  
7381 CAGAGGTTTT CACCGTCATC ACCGAAAACG CCGAGACGAA AGGGCCTCGT GATACGCCTA  
7441 TTTTTATAGG TTAATGTCAT GATAATAATG GTTTCCTAGA CGTCAGGTGG CACTTTTCGG  
7501 GGAATGTGCG GCGGAACCCC TATTTGTTTA TTTTCTAAA TACATTCAAA TATGTATCCG  
7561 CTCATGAGAC AATAACCCTG ATAAATGCTT CAATAATATT GAAAAAGGAA GAGTATGAGT  
7621 ATTCAACATT TCCGTGTCGC CCTTATTCCC TTTTTTGCGG CATTTTGCCT TCCTGTTTTT  
7681 GCTCACCCAG AAACGCTGGT GAAAGTAAAA GATGCTGAAG ATCAGTTGGG TGCACGAGTG  
7741 GGTTACATCG AACTGGATCT CAACAGCGGT AAGATCCTTG AGAGTTTTTCG CCCCAGAGAA  
7801 CGTTTTCCAA TGATGAGCAC TTTTAAAGTT CTGCTATGTG GCGCGGTATT ATCCCGTATT  
7861 GACGCGGGC AAGAGCAACT CGGTCCGGCG ATACACTATT CTGGAATGA TCTGGTTGAG  
7921 TACTACCAG TCACAGAAAA GCATCTTACG GATGGCATGA CAGTAAGAGA ATTATGCAGT

7981 GCTGCCATAA CCATGAGTGA TAACACTGCG GCCAACTTAC TTCTGACAAC GATCGGAGGA  
8041 CCGAAGGAGC TAACCGCTTT TTTGCACAAC ATGGGGGATC ATGTAACCTCG CCTTGATCGT  
8101 TGGGAACCGG AGCTGAATGA AGCCATACCA AACGACGAGC GTGACACCAC GATGCCTGTA  
8161 GCAATGGCAA CAACGTTGCG CAAACTATTA ACTGGCGAAC TACTTACTCT AGCTTCCCGG  
8221 CAACAATTA TAGACTGGAT GGAGGCGGAT AAAGTTGCGAG GACCACTTCT GCGCTCGGCC  
8281 CTTCCGGCTG GCTGGTTTAT TGCTGATAAA TCTGGAGCCG GTGAGCGTGG AAGCCGCGGT  
8341 ATCATTGAG CACTGGGGCC AGATGGTAAG CCCTCCCGTA TCGTAGTTAT CTACACGACG  
8401 GGGAGTCAGG CAACTATGGA TGAACGAAAT AGACAGATCG CTGAGATAGG TGCCTCACTG  
8461 ATTAAGCATT GGTAAGTGC AGACCAAGTT TACTCATATA TACTTTAGAT TGATTTAAAA  
8521 CTTCAATTTT AATTTAAAAAG GATCTAGGTG AAGATCCTTT TTGATAATCT CATGACCAAA  
8581 ATCCCTTAAC GTGAGTTTTT GTTCCACTGA GCGTCAGACC CCGTAGAAAA GATCAAAGGA  
8641 TCTTCTTGAG ATCCTTTTTT TCTGCGCGTA ATCTGCTGCT TGCAAACAAA AAAACCACCG  
8701 CTACCAGCGG TGGTTTGTTT GCCGGATCAA GAGCTACCAA CTCTTTTTCC GAAGGTAACT  
8761 GGCTTCAGCA GAGCGCAGAT ACCAAATACT GTCCTTCTAG TGTAGCCGTA GTTAGGCCAC  
8821 CACTTCAAGA ACTCTGTAGC ACCGCCTACA TACCTCGCTC TGCTAATCCT GTTACCAGTG  
8881 GCTGCTGCCA GTGGCGATAA GTCGTGTCTT ACCGGGTTGG ACTCAAGACG ATAGTTACCG  
8941 GATAAGGCGC AGCGGTCGGG CTGAACGGGG GGTTCGTGCA CACAGCCCAG CTTGGAGCGA  
9001 ACGACCTACA CCGAACTGAG ATACCTACAG CGTGAGCTAT GAGAAAGCGC CACGCTTCCC  
9061 GAAGGGAGAA AGGCGGACAG GTATCCGGTA AGCGGCAGGG TCGGAACAGG AGAGCGCACG  
9121 AGGGAGCTTC CAGGGGGAAA CGCCTGGTAT CTTTATAGTC CTGTCGGGTT TCGCCACCTC  
9181 TGACTTGAGC GTCGATTTTT GTGATGCTCG TCAGGGGGGC GGAGCCTATG GAAAAACGCC  
9241 AGCAACGCGG CCTTTTTACG GTTCCTGGCC TTTTGCTGGC CTTTTGCTCA CATGT
